# Supplementary material for: Theoretical exploration of the bromine substitution effect and hydrostatic pressure responsive mechanism for room temperature phosphorescence
Source: Royal Society of Chemistry journal article supplement (doi:10.1039/d3cp02770h), 2023-01-01
Supplement: d3cp02770h1.pdf [file d3cp02770h1.pdf]

### ***Supplementary Information***

Theoretical exploration of bromine substitution effect and hydrostatic pressure responsive mechanism for room temperature phosphorescence

Qingfang Mu<sup>1</sup>, Huanling Liu<sup>1</sup>, Yuzhi Song<sup>1</sup>, Chuan-Kui Wang<sup>1</sup>, Lili Lin<sup>1</sup>, Yuanyuan Xu<sup>2\*</sup>, Jianzhong Fan<sup>1,3\*</sup>

1. Shandong Province Key Laboratory of Medical Physics and Image Processing Technology, Institute of Materials and Clean Energy, School of Physics and Electronics, Shandong Normal University, Jinan 250014, China.
2. School of Science, Qilu University of Technology (Shandong Academy of Sciences), Jinan 250353, China.
3. Guangdong Provincial Key Laboratory of Luminescence from Molecular Aggregates (South China University of Technology), Guangzhou 510640, China.

#### **Corresponding Author**

\*Author to whom correspondence should be addressed.

E-mail: [fanjianzhongvip@163.com](mailto:fanjianzhongvip@163.com) and [15165131990@163.com](mailto:15165131990@163.com)

**Volume of entire box=1269.61 Å<sup>3</sup>**  
**Free volume=371.83 Å<sup>3</sup>**  
**Proportion=29.29%**

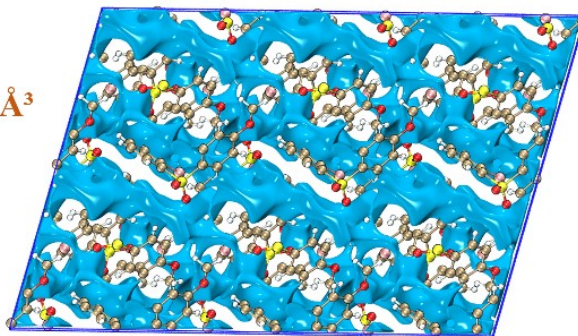

**2Br-OSPh**

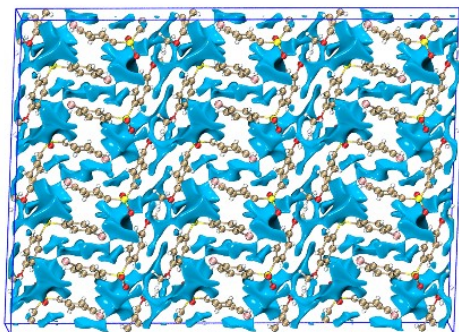

**3Br-OSPh**

**Volume of entire box=7556.13 Å<sup>3</sup>**  
**Free volume=2164.57 Å<sup>3</sup>**  
**Proportion=28.65%**

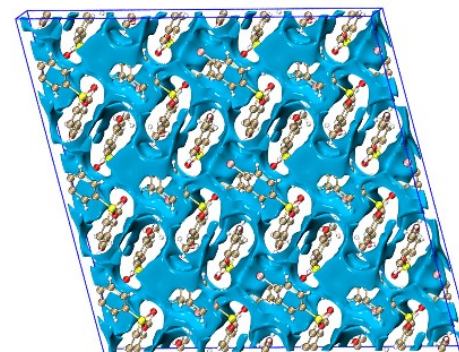

**4Br-OSPh**

**Volume of entire box=7669.92 Å<sup>3</sup>**  
**Free volume=2284.60 Å<sup>3</sup>**  
**Proportion=29.79%**

Figure S1. The free volume for 2Br-OSPh, 3Br-OSPh and 4Br-OSPh.

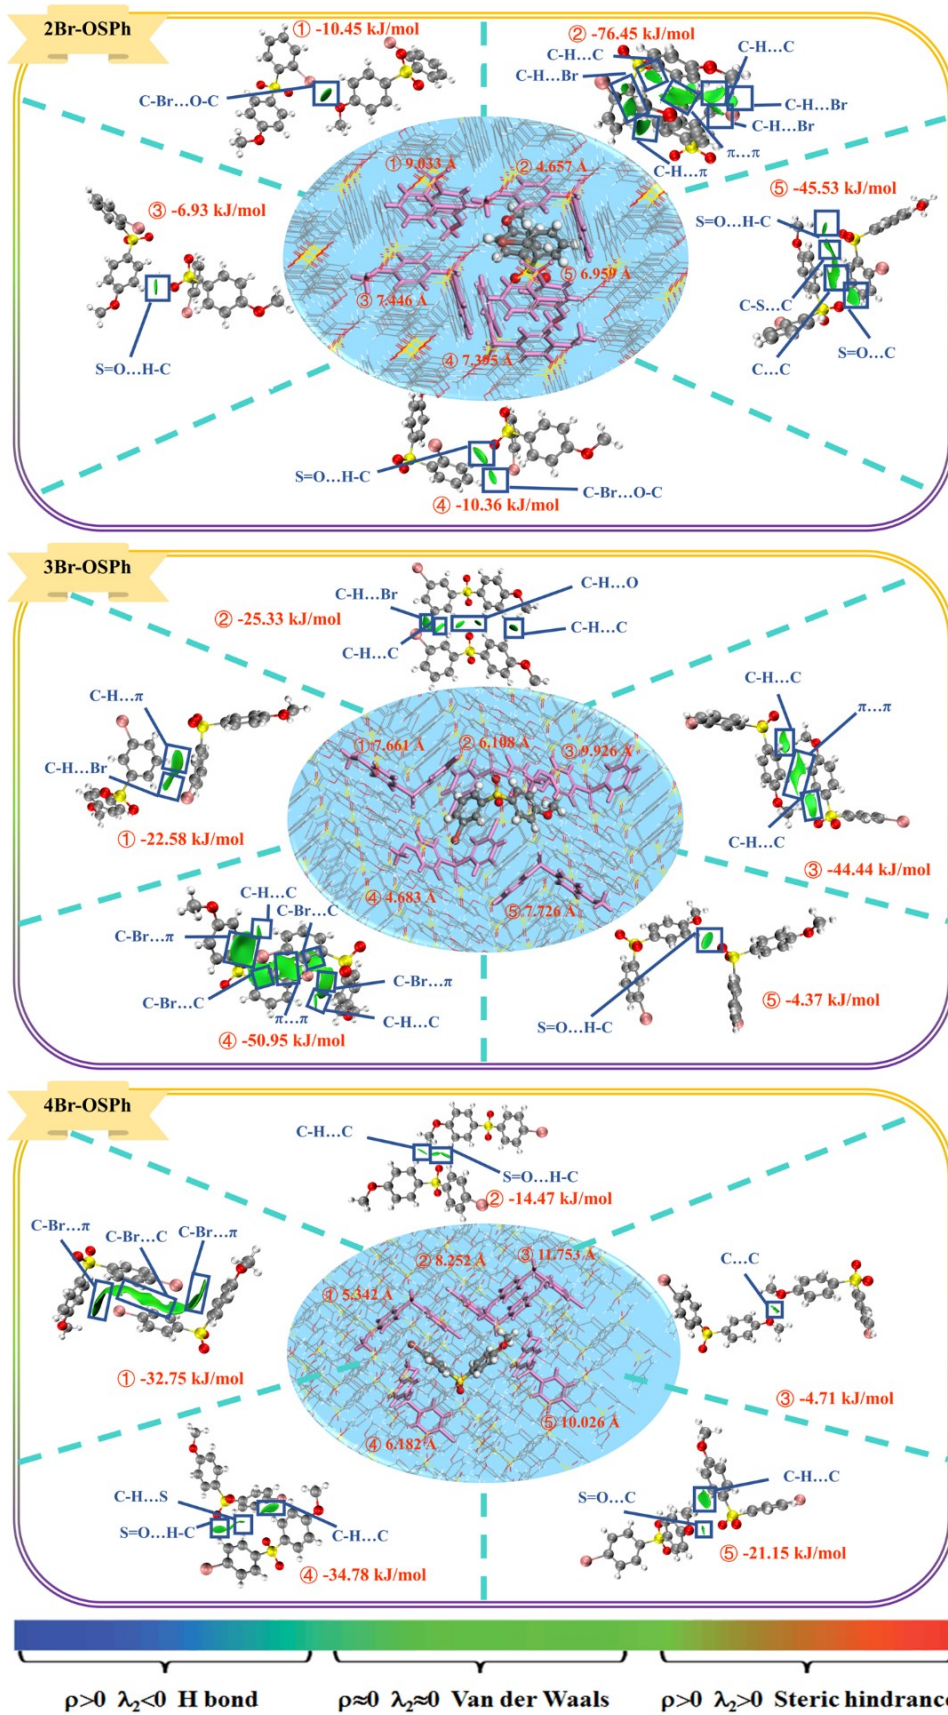

Figure S2. Intermolecular interactions for selected dimers of 2Br-OSPh, 3Br-OSPh and 4Br-OSPh described by IGMH method.



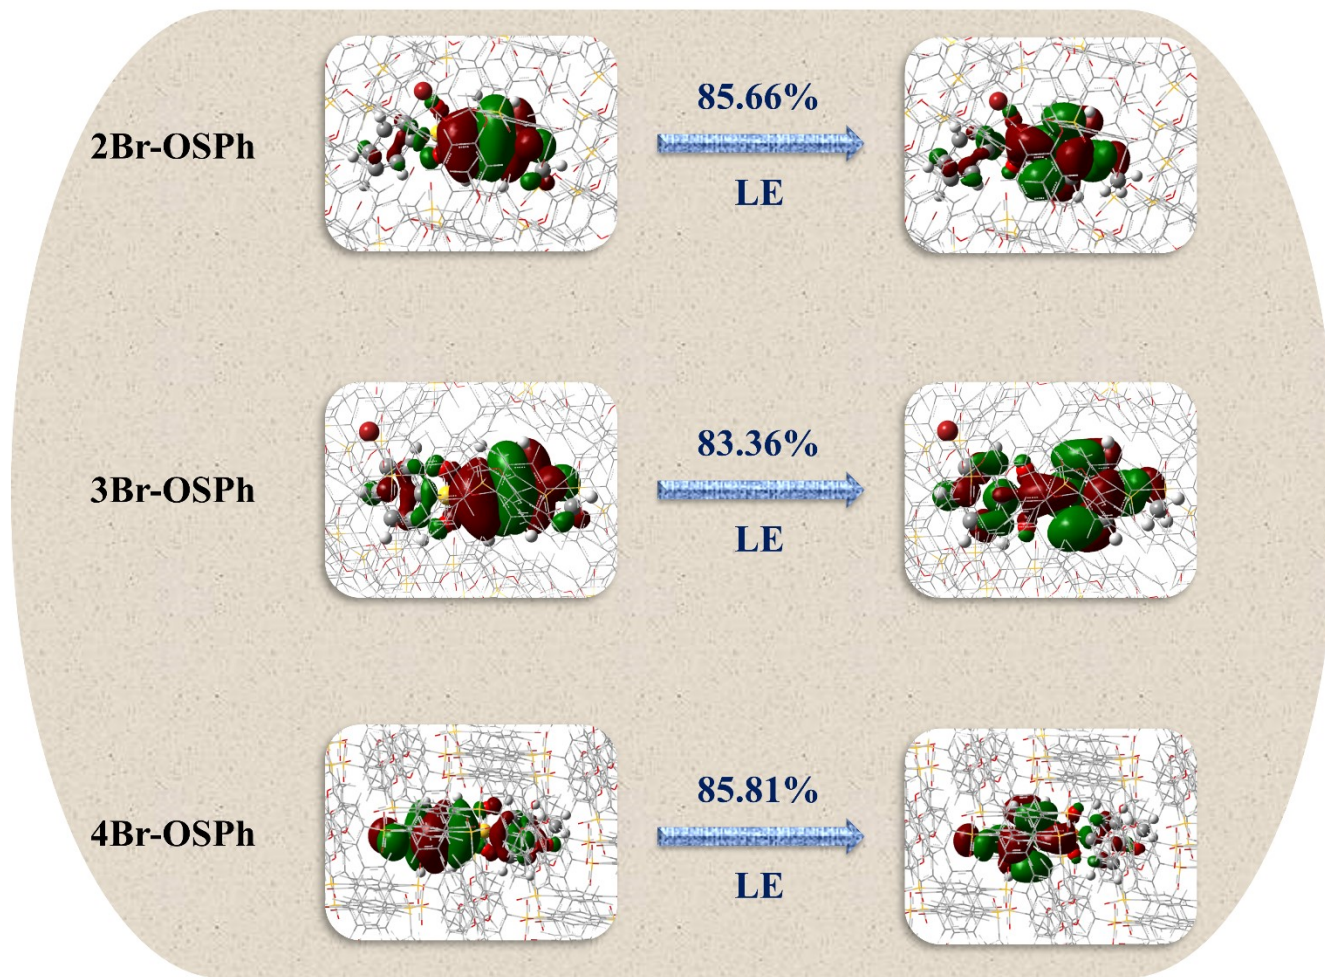

Figure S3. Natural transition orbitals (NTOs) of the  $T_1$  state for 2Br-OSPh, 3Br-OSPh and 4Br-OSPh in the crystal.

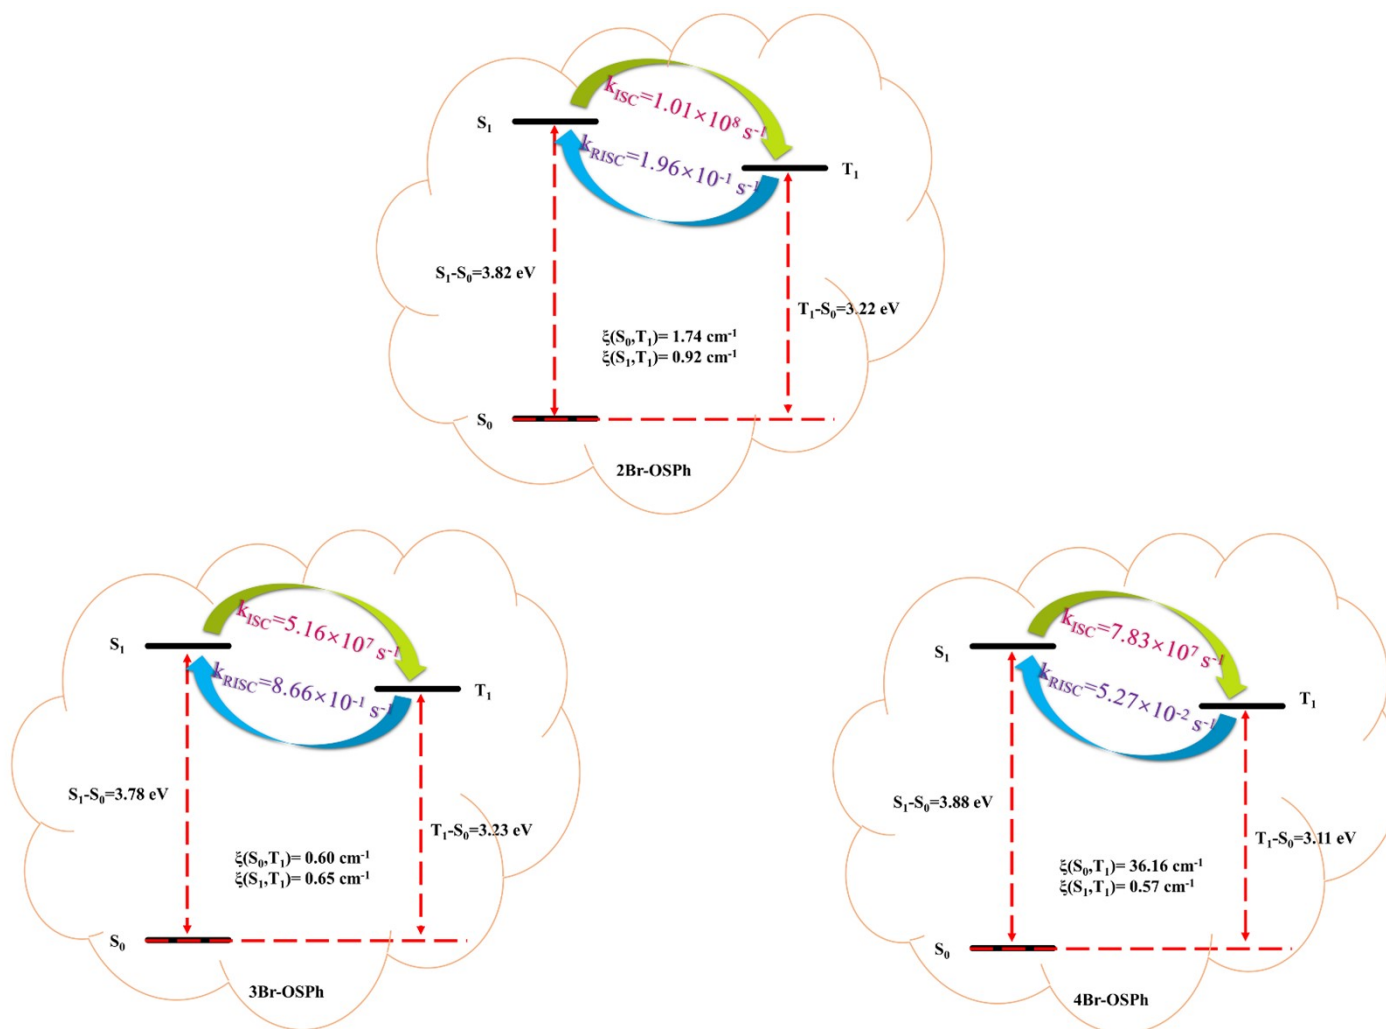

Figure S4. Adiabatic excitation energy diagrams for 2Br-OSPh, 3Br-OSPh and 4Br-OSPh in the crystal. Corresponding SOC constants are also listed.

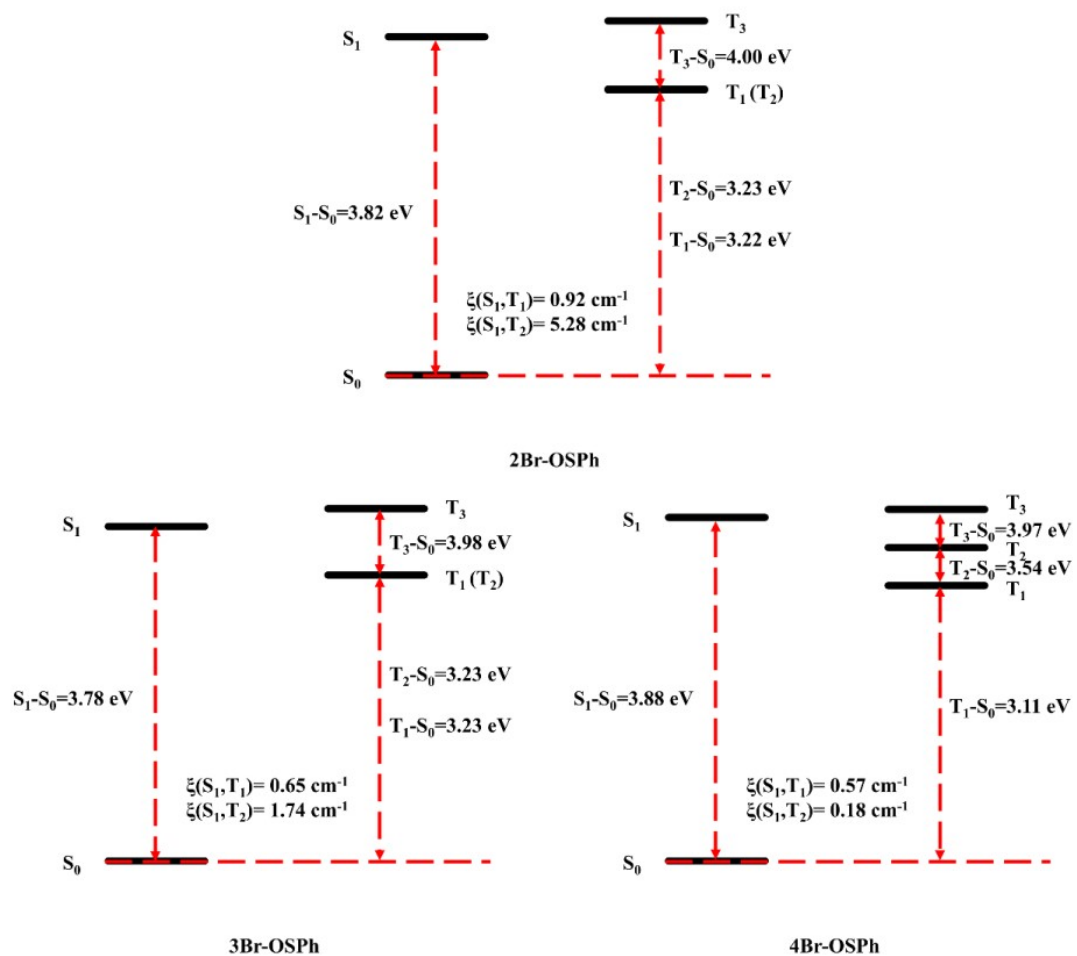

Figure S5. Adiabatic excitation energy diagrams for 2Br-OSPh, 3Br-OSPh and 4Br-OSPh in the crystal. Corresponding SOC constants are also listed.

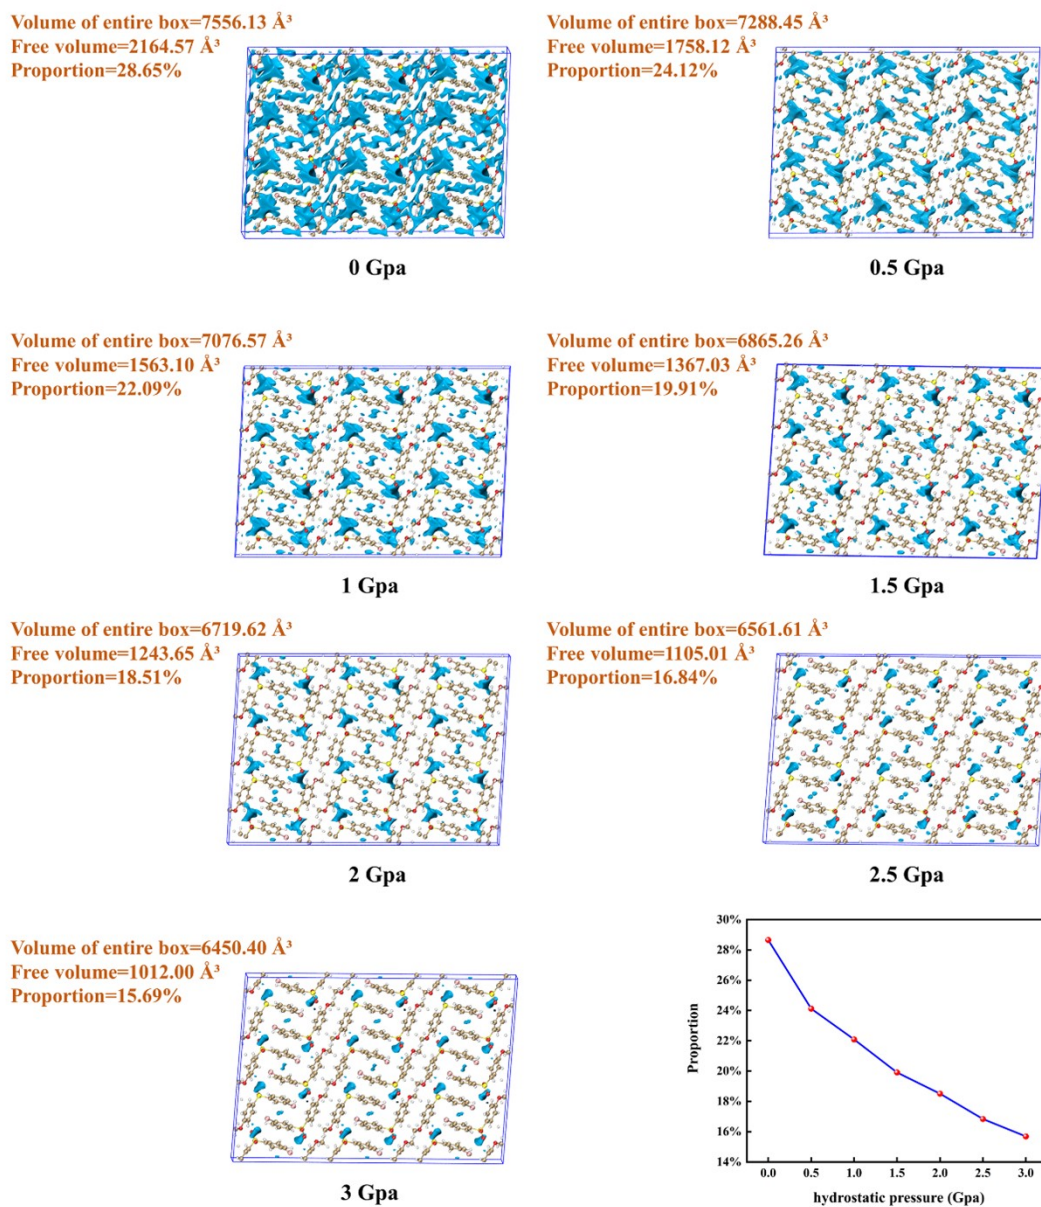

Figure S6. The free volume for 3Br-OSPh at different pressures.



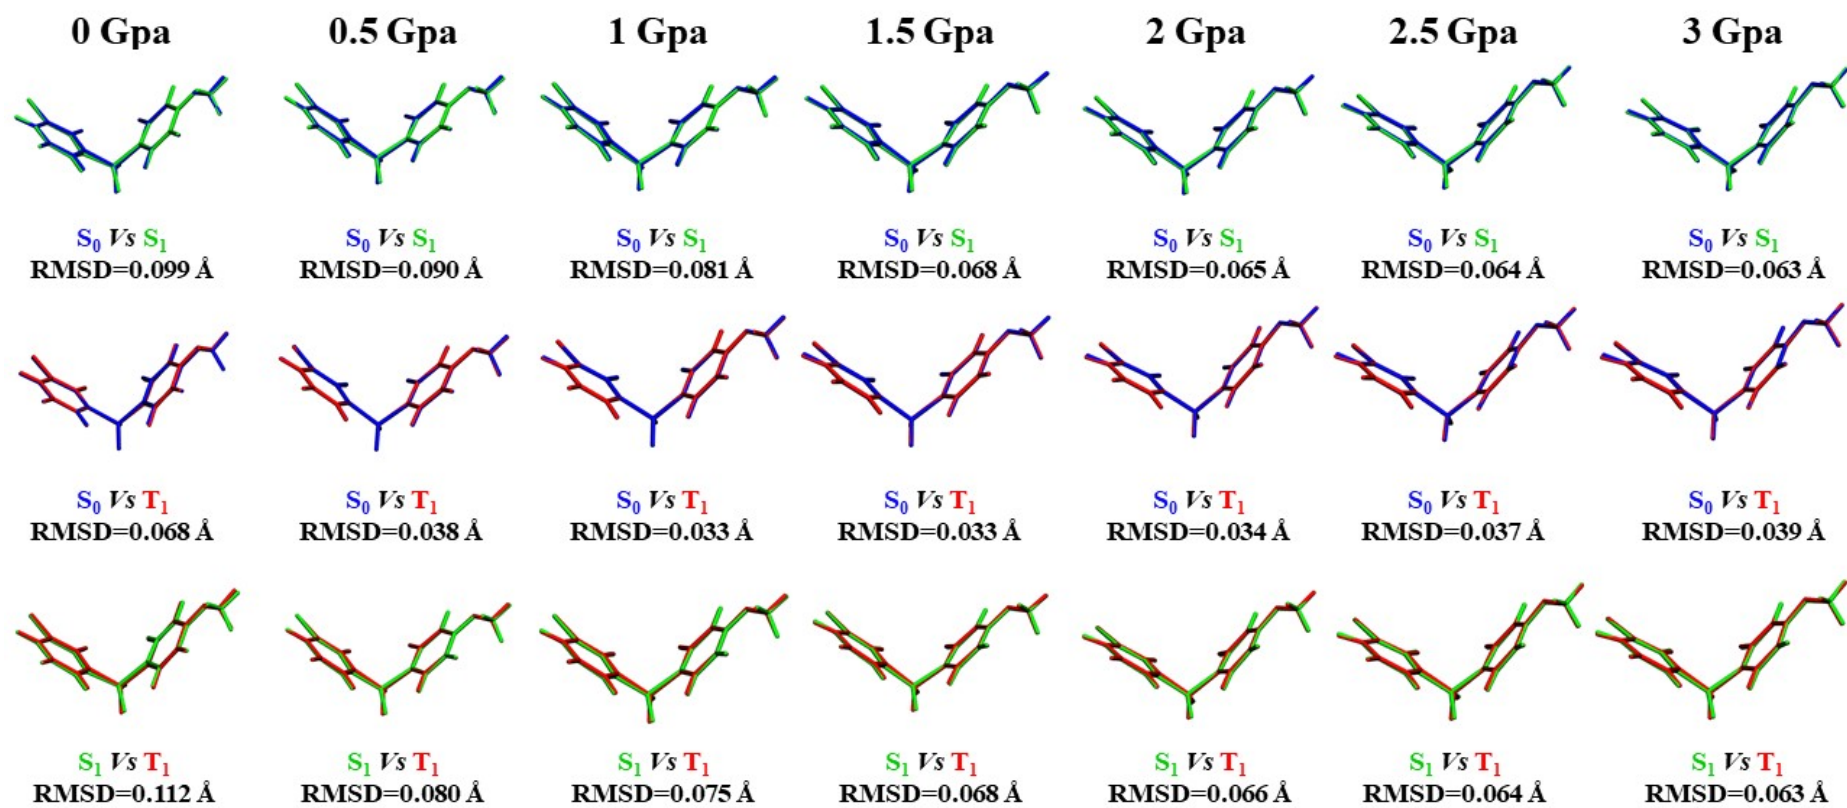

Figure S7. Geometry comparisons and RMSD values among  $S_0$  (blue),  $S_1$  (green) and  $T_1$  (red) for 3Br-OSPh at different pressures.



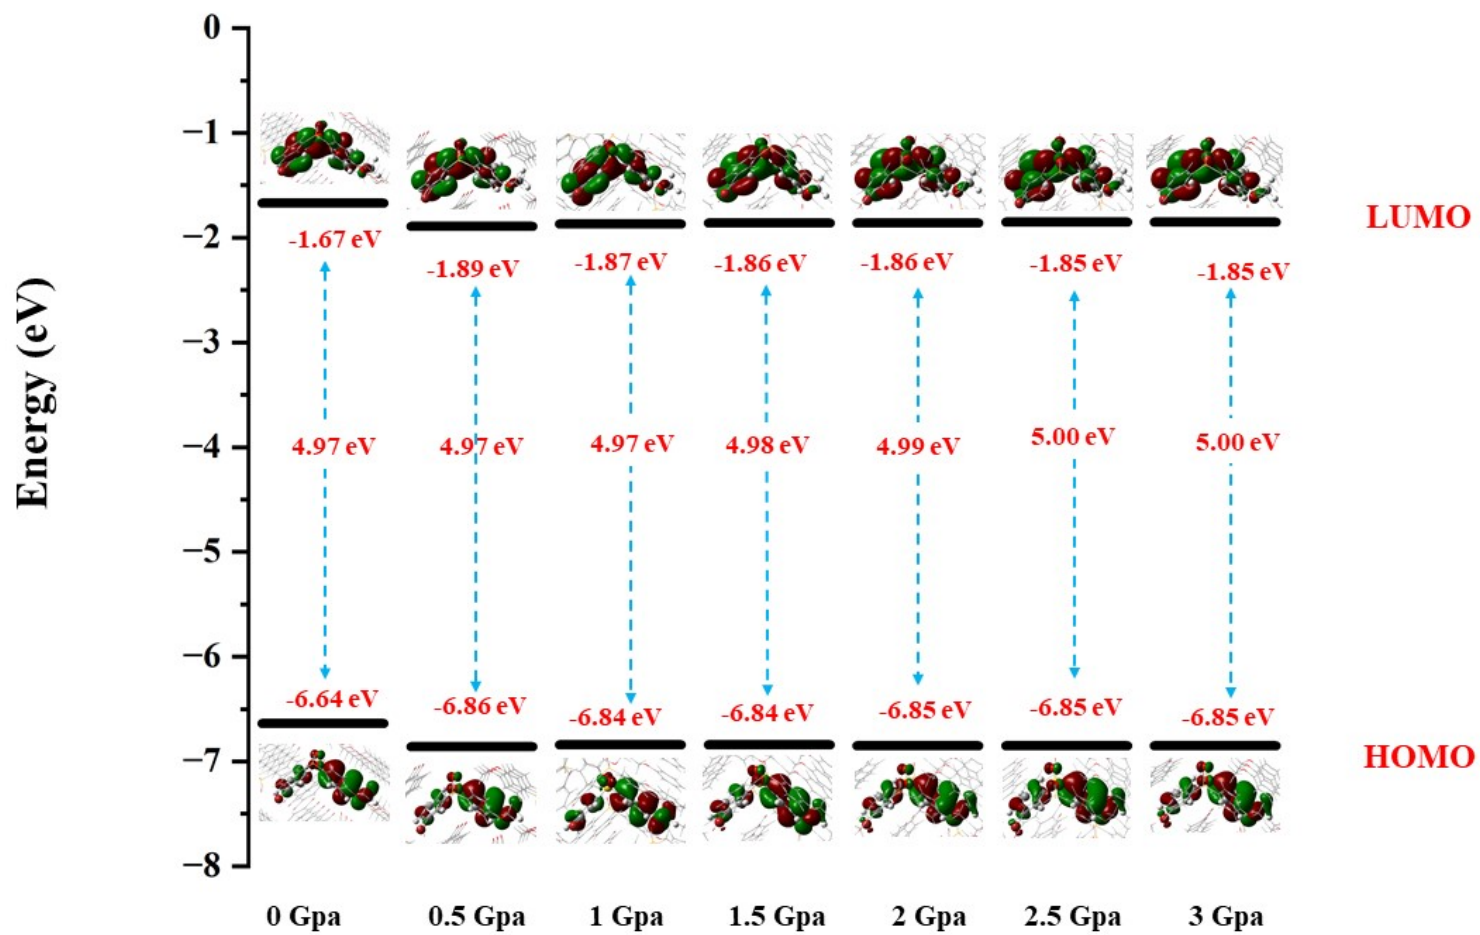

Figure S8. Calculated frontier orbital distributions and energies for 3Br-OSPh at different pressures.

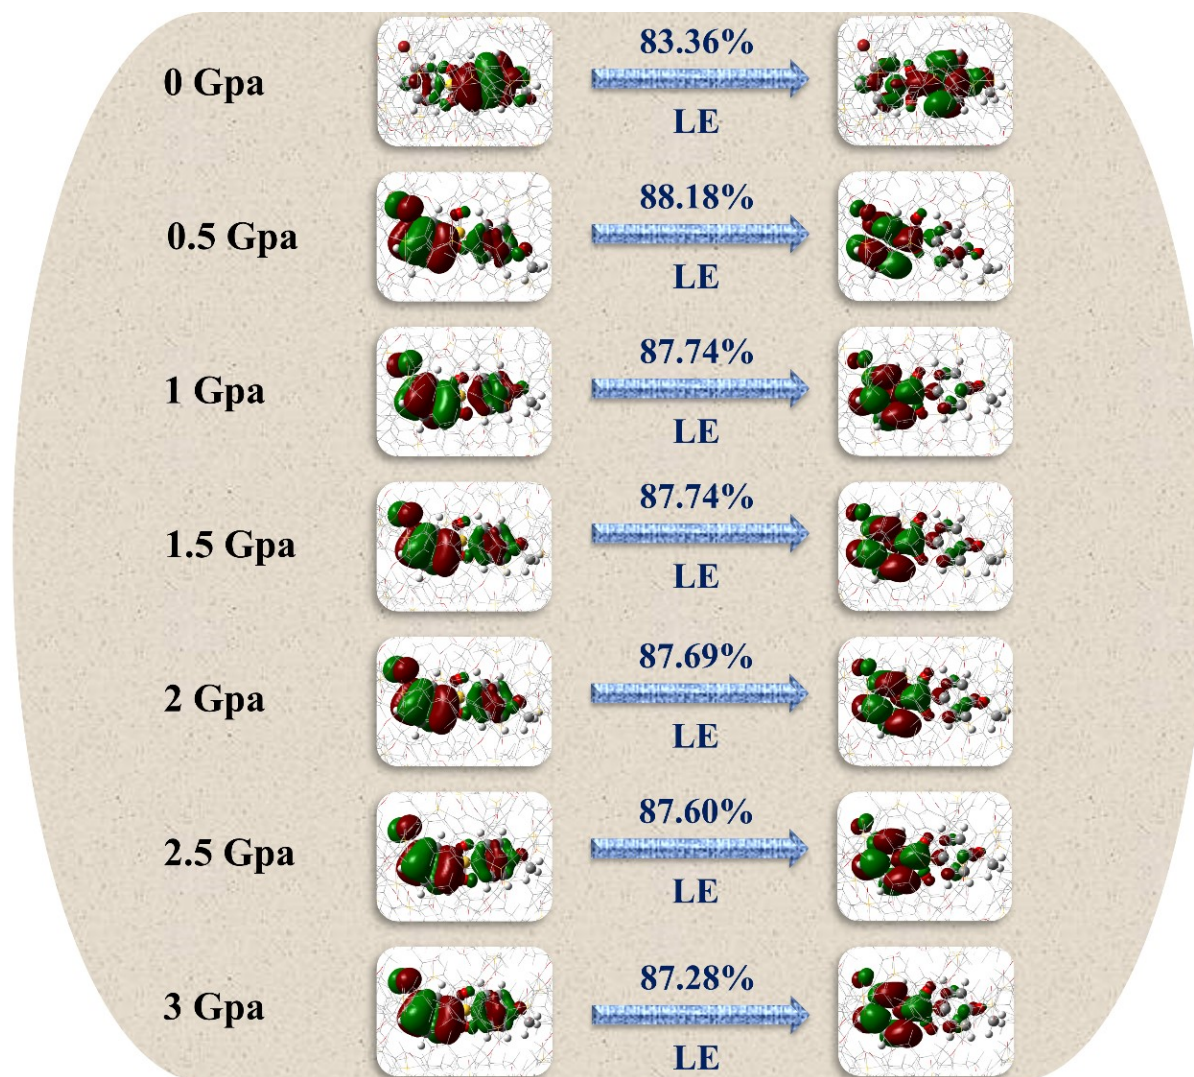

Figure S9. Natural transition orbitals (NTOs) of the  $T_1$  state for 3Br-OSPh at different pressures.



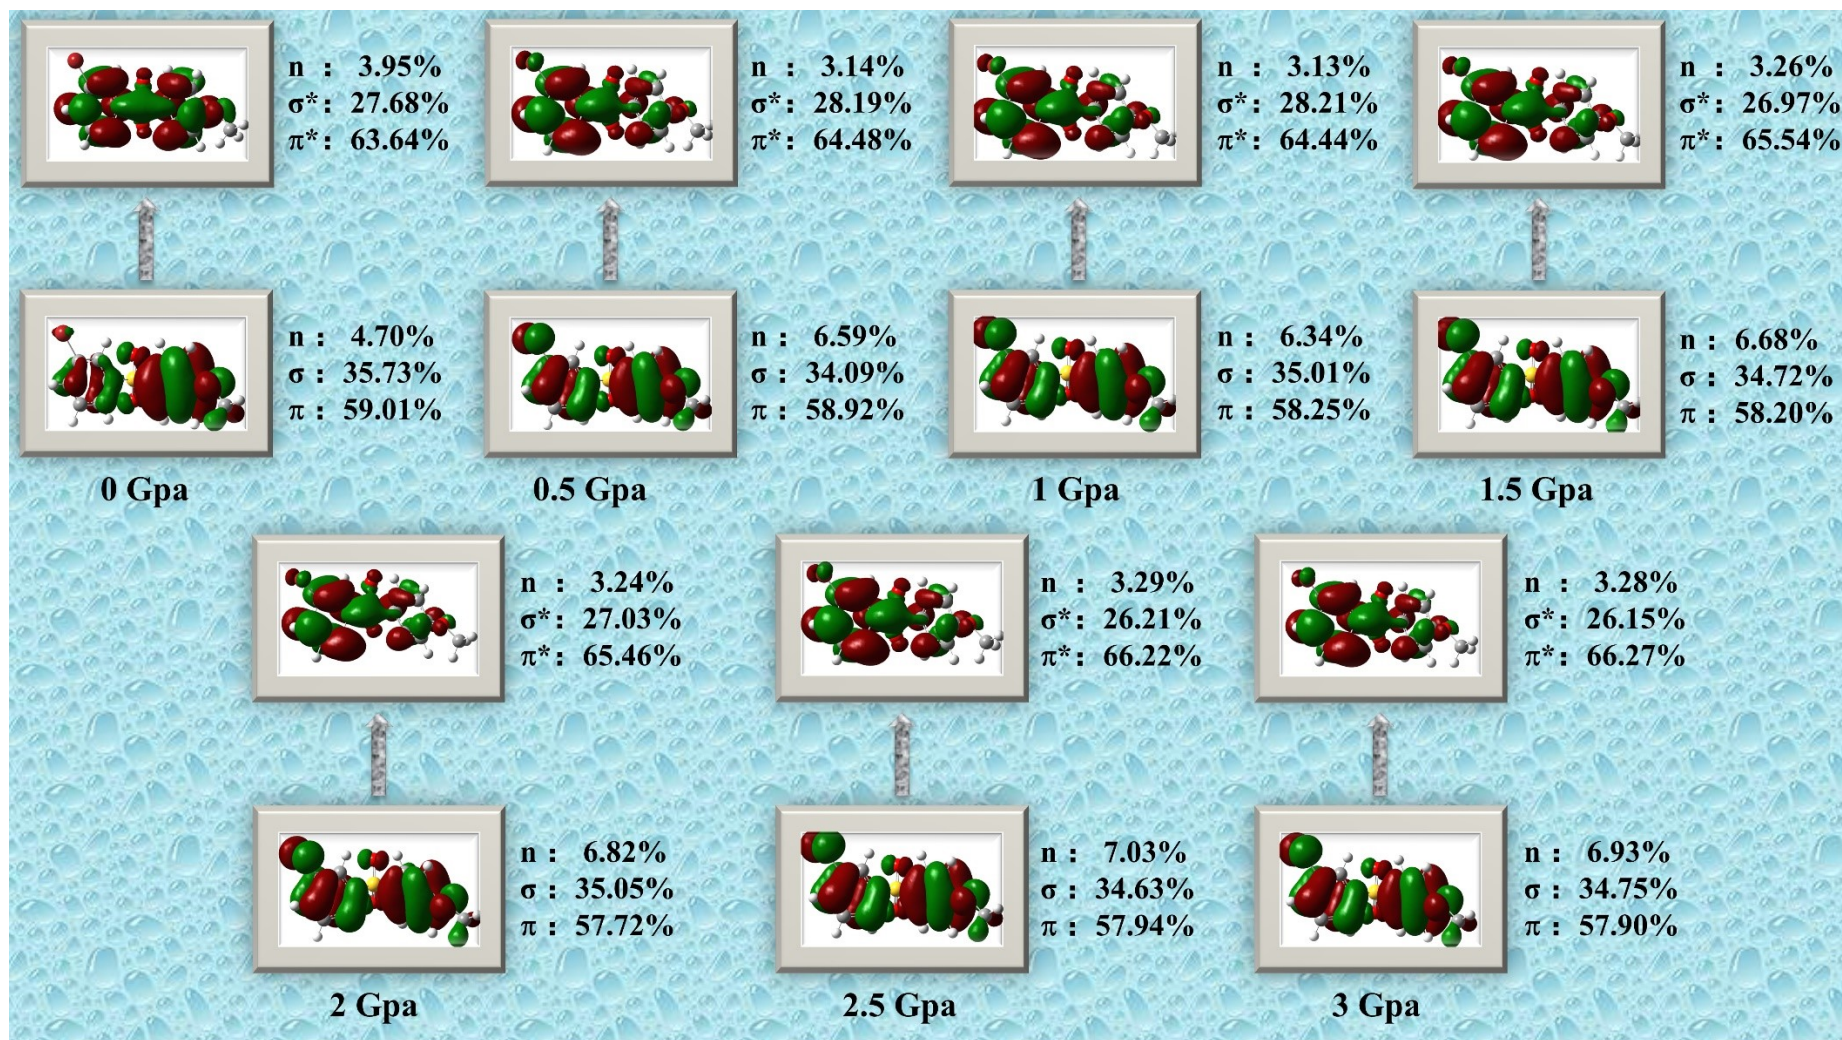

Figure S10. Composition (%) of atoms in frontier MOs for 3Br-OSPh at different pressures calculated by NAO method in the crystal.

Table S1. Intermolecular interaction energy analysis for selected dimers extracted from the crystal of 2Br-OSPh.

|          |         | Electrostatic | Repulsion | Dispersion | Total         |
|----------|---------|---------------|-----------|------------|---------------|
| 2Br-OSPh | Dimer-1 | -1.71         | 3.62      | -12.37     | -10.45 kJ/mol |
|          | Dimer-2 | -2.00         | 45.40     | -119.86    | -76.45 kJ/mol |
|          | Dimer-3 | 4.44          | 6.06      | -17.42     | -6.93 kJ/mol  |
|          | Dimer-4 | -2.43         | 14.37     | -22.30     | -10.36 kJ/mol |
|          | Dimer-5 | -6.63         | 20.61     | -59.50     | -45.53 kJ/mol |

Table S2. Intermolecular interaction energy analysis for selected dimers extracted from the crystal of 3Br-OSPh.

|          |         | Electrostatic | Repulsion | Dispersion | Total         |
|----------|---------|---------------|-----------|------------|---------------|
| 3Br-OSPh | Dimer-1 | 0.15          | 18.01     | -40.74     | -22.58 kJ/mol |
|          | Dimer-2 | 2.49          | 16.53     | -44.34     | -25.33 kJ/mol |
|          | Dimer-3 | -6.55         | 22.51     | -60.40     | -44.44 kJ/mol |
|          | Dimer-4 | -0.24         | 41.17     | -91.87     | -50.95 kJ/mol |
|          | Dimer-5 | 1.71          | 8.30      | -14.38     | -4.37 kJ/mol  |

Table S3. Intermolecular interaction energy analysis for selected dimers extracted from the crystal of 4Br-OSPh.



|          |         | Electrostatic | Repulsion | Dispersion | Total         |
|----------|---------|---------------|-----------|------------|---------------|
| 4Br-OSPh | Dimer-1 | 0.49          | 45.63     | -78.86     | -32.75 kJ/mol |
|          | Dimer-2 | -2.46         | 11.42     | -23.43     | -14.47 kJ/mol |
|          | Dimer-3 | 5.76          | 4.52      | -14.98     | -4.71kJ/mol   |
|          | Dimer-4 | -7.06         | 19.58     | -47.30     | -34.78 kJ/mol |
|          | Dimer-5 | 1.66          | 11.62     | -34.42     | -21.15 kJ/mol |

Table S4. Calculated adiabatic singlet and triplet energies and SOC constants ( $\text{cm}^{-1}$ ) among  $S_0$ ,  $S_1$  and  $T_1$  for all studied molecules in the crystal and gas phase.

|                                            |       | Gas phase |          |          | Crystal  |          |          |
|--------------------------------------------|-------|-----------|----------|----------|----------|----------|----------|
|                                            |       | 2Br-OSPh  | 3Br-OSPh | 4Br-OSPh | 2Br-OSPh | 3Br-OSPh | 4Br-OSPh |
| <b>E (eV)</b>                              | $S_1$ | 3.80      | 3.75     | 3.76     | 3.82     | 3.78     | 3.88     |
|                                            | $T_1$ | 3.46      | 3.38     | 3.36     | 3.22     | 3.23     | 3.11     |
| $\langle S_0   \hat{H}_{so}   T_1 \rangle$ |       | 2.11      | 0.23     | 0.83     | 1.74     | 0.60     | 36.16    |
| $\langle S_1   \hat{H}_{so}   T_1 \rangle$ |       | 1.07      | 0.31     | 0.38     | 0.92     | 0.65     | 0.57     |

Table S5. Intermolecular interaction energy analysis for selected dimers extracted from the crystal of 3Br-OSPh at 0.5 Gpa.

|         |         | Electrostatic | Repulsion | Dispersion | Total         |
|---------|---------|---------------|-----------|------------|---------------|
| 0.5 Gpa | Dimer-1 | 0.46          | 24.75     | -45.76     | -20.54 kJ/mol |
|         | Dimer-2 | 1.62          | 30.05     | -53.62     | -21.93 kJ/mol |
|         | Dimer-3 | -10.52        | 32.04     | -66.92     | -45.40 kJ/mol |
|         | Dimer-4 | -1.35         | 49.69     | -98.56     | -50.22 kJ/mol |
|         | Dimer-5 | -0.66         | 27.84     | -19.70     | 7.47 kJ/mol   |

Table S6. Intermolecular interaction energy analysis for selected dimers extracted from the crystal of 3Br-OSPh at 1 Gpa.

|       |         | Electrostatic | Repulsion | Dispersion | Total         |
|-------|---------|---------------|-----------|------------|---------------|
| 1 Gpa | Dimer-1 | 0.46          | 28.07     | -48.44     | -19.91 kJ/mol |
|       | Dimer-2 | 1.81          | 37.13     | -58.67     | -19.73 kJ/mol |
|       | Dimer-3 | -10.84        | 40.66     | -73.59     | -43.77 kJ/mol |
|       | Dimer-4 | -1.33         | 59.52     | -106.55    | -48.36 kJ/mol |
|       | Dimer-5 | -0.58         | 34.55     | -21.25     | 12.72 kJ/mol  |

Table S7. Intermolecular interaction energy analysis for selected dimers extracted from the crystal of 3Br-OSPh at 1.5 Gpa.

|         |         | Electrostatic | Repulsion | Dispersion | Total         |
|---------|---------|---------------|-----------|------------|---------------|
| 1.5 Gpa | Dimer-1 | 0.41          | 36.17     | -54.78     | -18.20 kJ/mol |
|         | Dimer-2 | 1.92          | 40.56     | -60.79     | -18.31 kJ/mol |
|         | Dimer-3 | -10.77        | 43.38     | -75.41     | -42.80 kJ/mol |
|         | Dimer-4 | -1.33         | 70.34     | -115.12    | -46.12 kJ/mol |
|         | Dimer-5 | -0.57         | 36.10     | -23.08     | 12.45 kJ/mol  |

Table S8. Intermolecular interaction energy analysis for selected dimers extracted from the crystal of 3Br-OSPh at 2 Gpa.

|       |         | Electrostatic | Repulsion | Dispersion | Total         |
|-------|---------|---------------|-----------|------------|---------------|
| 2 Gpa | Dimer-1 | 0.44          | 39.05     | -56.97     | -17.48 kJ/mol |
|       | Dimer-2 | 2.05          | 48.31     | -65.30     | -14.94 kJ/mol |
|       | Dimer-3 | -10.94        | 48.18     | -78.41     | -41.17 kJ/mol |
|       | Dimer-4 | -1.32         | 77.94     | -120.72    | -44.10 kJ/mol |
|       | Dimer-5 | -0.49         | 41.86     | -24.60     | 16.77 kJ/mol  |

Table S9. Intermolecular interaction energy analysis for selected dimers extracted from the crystal of 3Br-OSPh at 2.5 Gpa.

|         |         | Electrostatic | Repulsion | Dispersion | Total         |
|---------|---------|---------------|-----------|------------|---------------|
| 2.5 Gpa | Dimer-1 | 0.43          | 43.25     | -60.61     | -16.93 kJ/mol |
|         | Dimer-2 | 2.25          | 55.08     | -68.30     | -10.97 kJ/mol |
|         | Dimer-3 | -10.88        | 54.75     | -82.39     | -38.52 kJ/mol |
|         | Dimer-4 | -1.33         | 90.60     | -129.71    | -40.44 kJ/mol |
|         | Dimer-5 | -0.56         | 44.86     | -26.46     | 17.84 kJ/mol  |

Table S10. Intermolecular interaction energy analysis for selected dimers extracted from the crystal of 3Br-OSPh at 3 Gpa.

|       |         | Electrostatic | Repulsion | Dispersion | Total         |
|-------|---------|---------------|-----------|------------|---------------|
| 3 Gpa | Dimer-1 | 0.41          | 47.12     | -63.25     | -15.71 kJ/mol |
|       | Dimer-2 | 2.31          | 62.16     | -71.60     | -7.13 kJ/mol  |
|       | Dimer-3 | -10.98        | 59.44     | -85.08     | -36.61 kJ/mol |
|       | Dimer-4 | -1.35         | 100.87    | -136.07    | -36.55 kJ/mol |
|       | Dimer-5 | -0.53         | 49.30     | -27.74     | 21.03 kJ/mol  |
